# Supplementary material for: The oncolytic peptide LTX-315 kills cancer cells through Bax/Bak-regulated mitochondrial membrane permeabilization
Source: PubMed Central journal article supplement (PMC4694939; doi:10.18632/oncotarget.5613), 2015-09-10
Supplement: oncotarget-06-26599-s001.pdf [file oncotarget-06-26599-s001.pdf]

# The oncolytic peptide LTX-315 kills cancer cells through Bax/Bak-regulated mitochondrial membrane permeabilization

## Supplementary Material

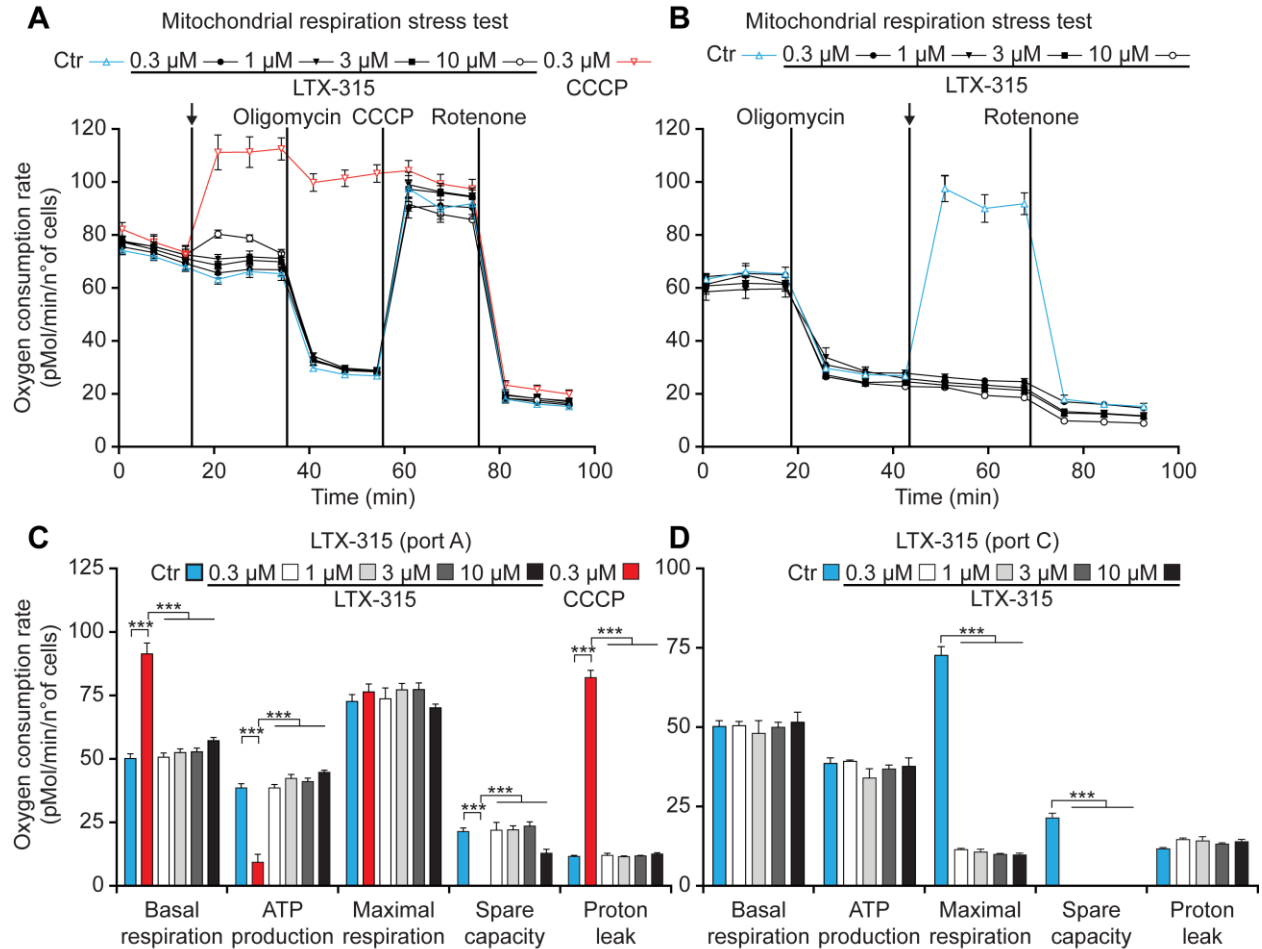

**Supplemental figure 1.** No stimulation of oxygen consumption by LTX-315. Cells were cultured in specialized XF-96-well plates, and the indicated concentrations of LTX-315 or CCCP were added followed by oligomycin, CCCP and rotenone, as pointed at by the arrows. Oxygen consumption was monitored continuously in a Seahorse XF96 apparatus. Results are means  $\pm$  SD of hexaplicates.

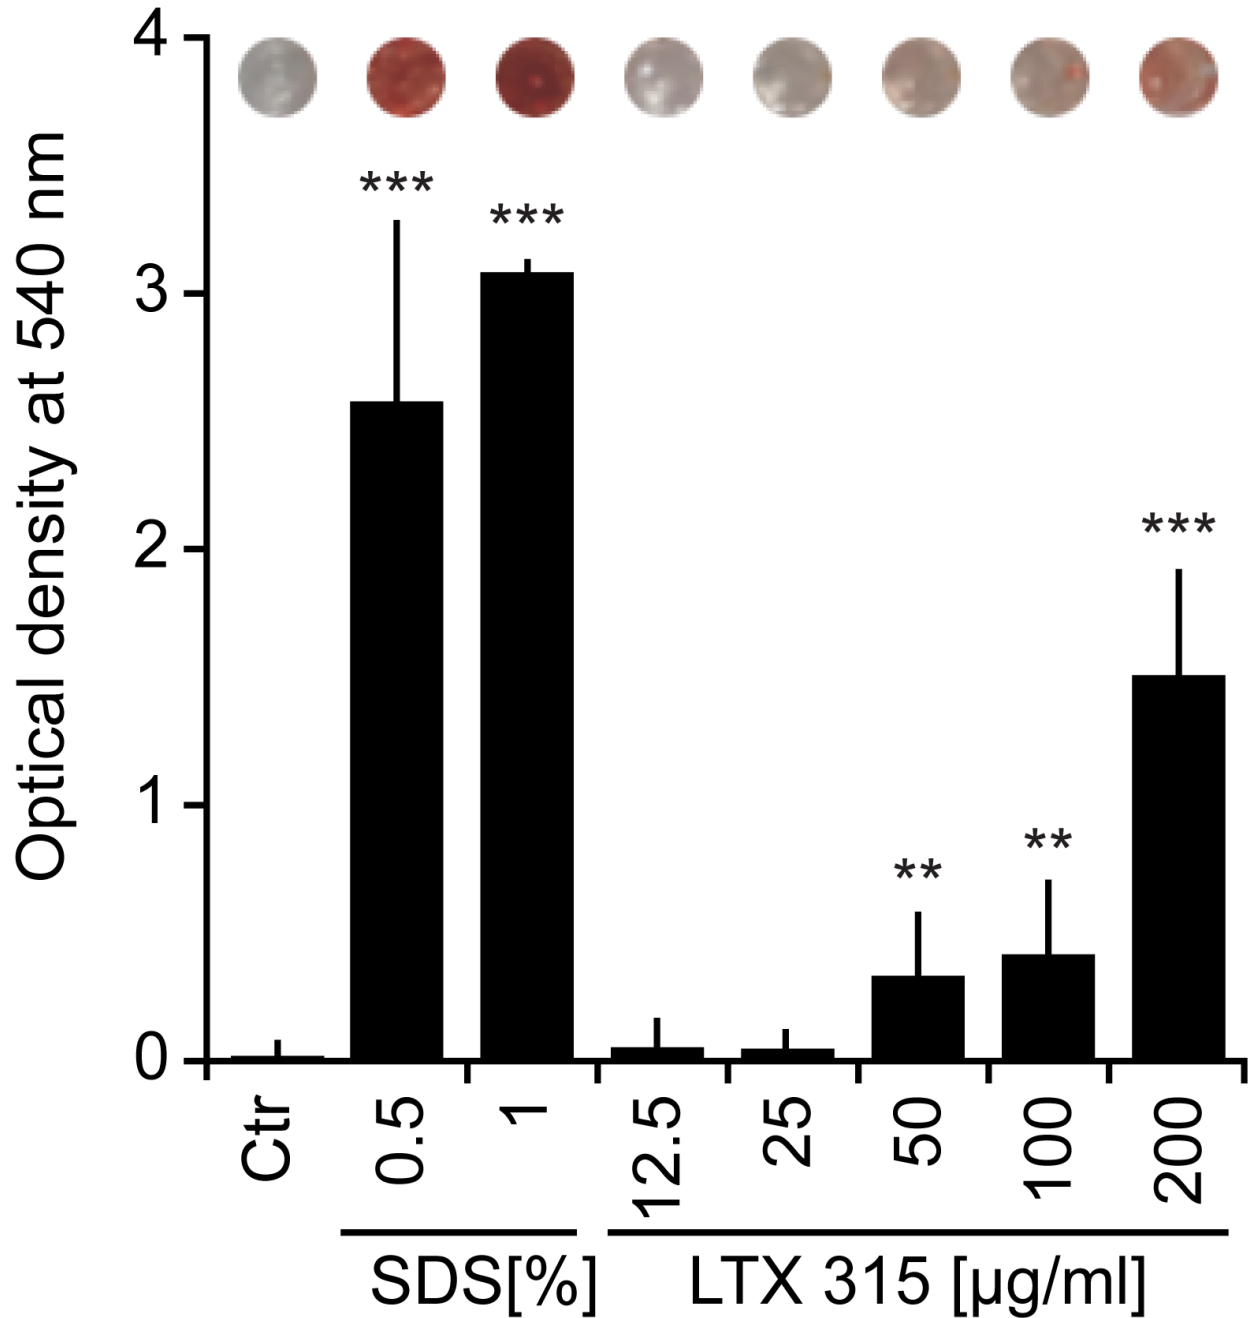

**Supplemental figure 2.** Partial erythrolysis induced by LTX-315. Erythrocytes were isolated from a healthy donor and were subjected to treatment with the indicated concentrations of LTX-315. Erythrolysis was measured in the supernatants of treated cells via the absorbance detection of released hemoglobin. The inset shows the color of the supernatants of the cells as a sign of hemolysis. Results are means  $\pm$  SD of quadruplicates. Asterisks indicate significant (unpaired Student t test) changes with respect to untreated controls (Ctr). \* $p < 0.05$ ; \*\*  $p < 0.01$ ; \*\*\* $p < 0.001$ .
